# Supplementary material
Source: Royal Society of Chemistry journal article supplement (doi:10.1039/d6an00200e)
Supplement: d6an00200e1.pdf [file d6an00200e1.pdf]

## Supplementary data

### **Evaluation of vardenafil's metabolic stability in human liver microsomes through ultra-fast UPLC-MS/MS for quantitative analysis, including assessments of greenness, ADME properties, DEREK alerts, and metabolic lability**

Mohamed W. Attwa \*, Adnan A. Kadi

Department of Pharmaceutical Chemistry, College of Pharmacy, King Saud University, Riyadh, Saudi Arabia.

Mohamed W. Attwa: <https://orcid.org/0000-0002-1147-4960>

Adnan A. Kadi: <https://orcid.org/0000-0001-8115-4228>

\*Correspondence to:

Dr. Mohamed W. Attwa

E-mail: [mzeidan@ksu.edu.sa](mailto:mzeidan@ksu.edu.sa)

Fax: +966 1146 76 220

Tel.: +966 1146 70237

## VRF in-silico ADME parameters

The SwissADME tool, developed by the Swiss Institute of Bioinformatics, is used to assess VRF ADME properties. It is accessible online at <http://www.swissadme.ch/>, with data retrieved on November 21, 2025<sup>1,2</sup>.

The ADME profile of VRF was evaluated using its SMILES notation, CCOc1ccc(cc1c1[nH]c(=O)c2n(n1)c(CCC)nc2C)S(=O)(=O)N1CCN(CC1)CC, through the SwissADME platform. An analysis was conducted to assess VRF's potential to exhibit drug-like characteristics by examining its ADME properties. The log P value suggested moderate water solubility (Log S = -4.65). The predicted pharmacokinetic profile for gastrointestinal absorption shows likely significant absorption, though its ability to cross the blood-brain barrier remains unknown. Drug similarity assessment adhered to Lipinski's criteria (0 violations), Veber's standards, Muegge<sup>3,4</sup>, and the Egan criteria. It doesn't meet the Ghose standards (No; 2 violations: MW > 480, MR > 130)<sup>5</sup>. The proposed bioavailability mark is 0.55. The Log Kp score, indicative of skin permeability, is -7.53 cm/s. The postulated mechanism of VRF activity involves inhibiting P-glycoprotein, a substrate. The data indicate that VRF does not inhibit CYP2C9 and CYP3A4 sub-enzymes. VRF exhibits no inhibitory influence on the CYP1A2, CYP2C19, and CYP2D6 sub-enzymes. Figure 2A illustrates the ADME radar pattern for VRF, with relevant information outlined in Table 1.

**Figures:**

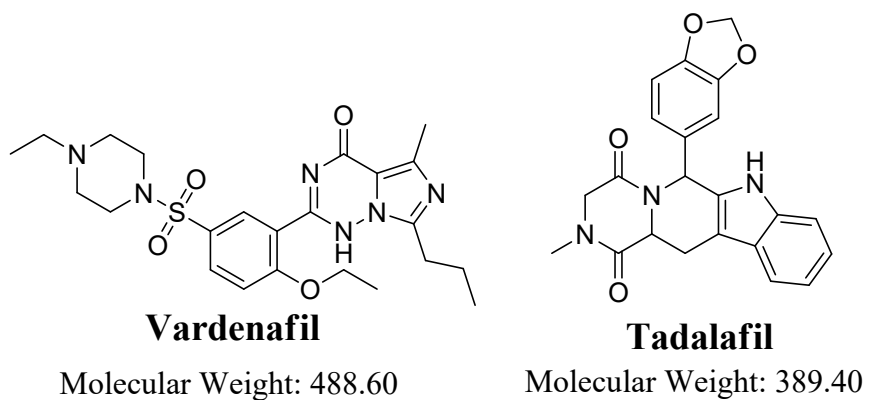

**Fig. S1.** The chemical structure of vardenafil and tadalafil (IS).

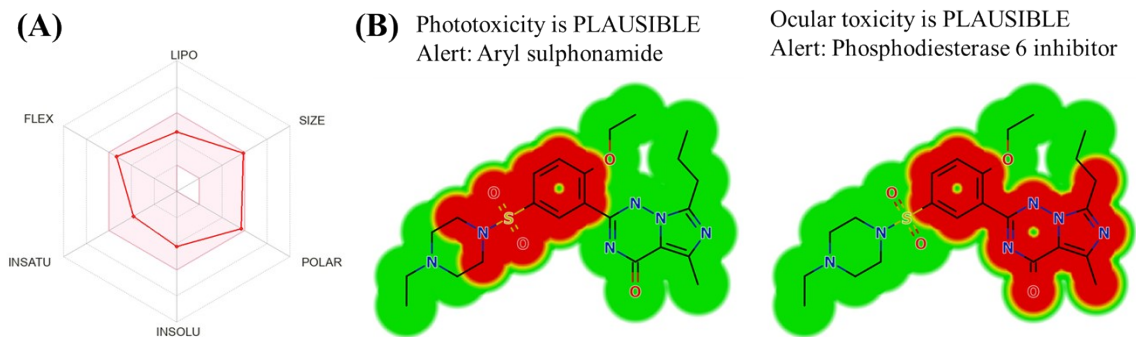

**Fig. S2.** Saturation (INSATU): carbons fraction in  $sp^3$  hybridization 0.52; Molecular weight (SIZE): 488.60 g/mol; Polarity (POLAR): TPSA 121.28 Å<sup>2</sup>; Flexibility (FLEX): 8 rotatable bonds; Solubility (INSOLU):  $\log S \leq -6.21$ ; Lipophilicity (LIPO) is determined as XLOGP3 = +2.46. The VRF ADME radar chart was generated using the in silico SwissADME online software (**A**). The in silico structural toxic alerts for VRF were tested using DEREK, which highlighted them in red (**B**).

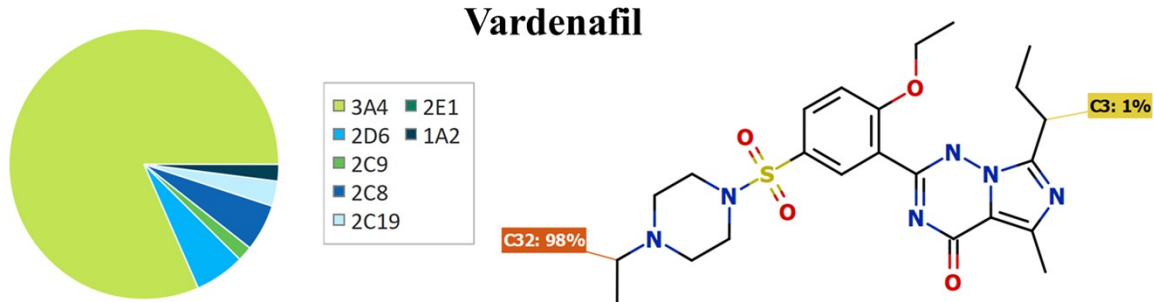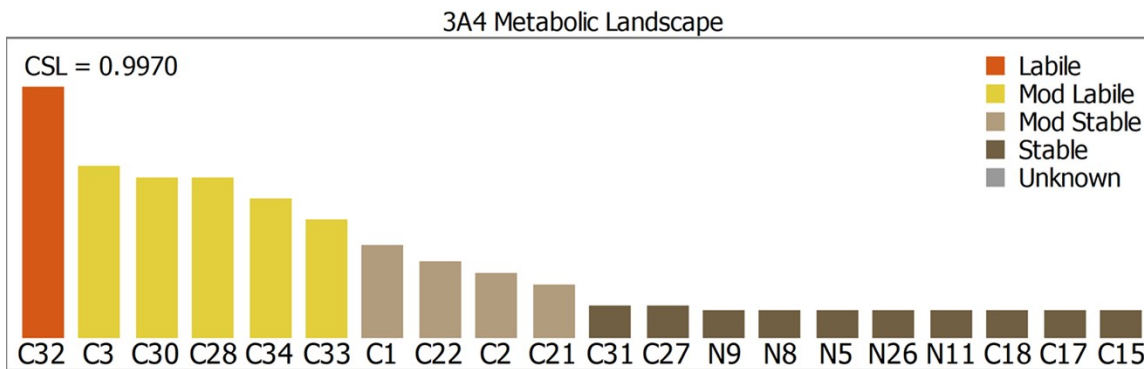

**Fig. S3.** The metabolic lability data revealed a CSL value of 0.9970, indicating that VRF is highly metabolically labile (unstable). The outcomes were estimated using the P450 tool.

**Small structural changes or replacement  
in the 4-ethylpiperazine ring at C32 (98%)  
and propyl group at C3 (1%)  
could improve the vardenafil metabolic stability**

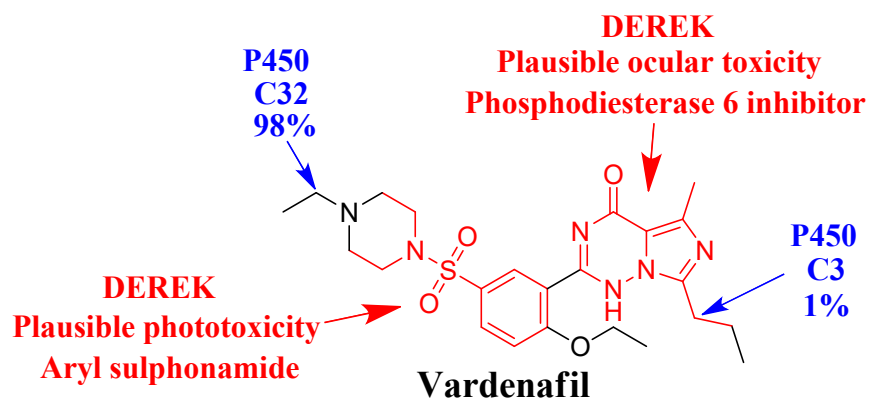

**Fig. S4.** The VRF structure shows the P450 metabolic sites marked in blue, with the 4-ethylpiperazine ring at C32 (98%) and the propyl group at C3 (1%) also marked in blue, which are accountable for VRF's metabolic lability. However, VRF DEREK alert predictions (red) indicate that Aryl sulphonamide is expected to exhibit plausible phototoxicity.

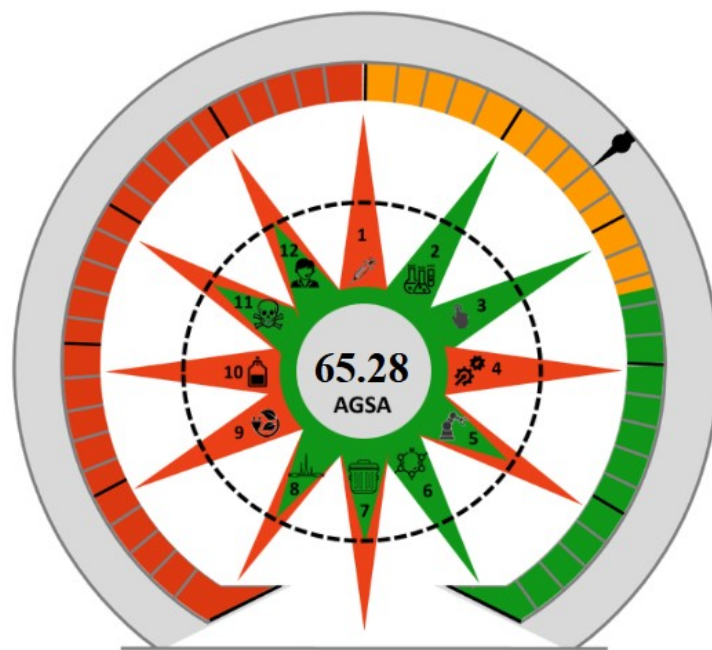

**Fig. S5.** The greenness evaluation results for the established technique (UPLC-MS/MS) using the AGSA, freely available online software, yield a score of 65.28, indicating a good degree of greenness.

## Tables:

**Table S1.** The ADME characteristics of VRF were evaluated using the online SwissADME tool.

| <b>Physicochemical characteristics</b> |                                                                 | <b>Water Solubility</b>    |                                    |
|----------------------------------------|-----------------------------------------------------------------|----------------------------|------------------------------------|
| Heavy atom number.                     | 34                                                              | Solubility                 | 2.96e-02 mg/ml; 6.06e-05 mol/l     |
| Formula                                | C <sub>23</sub> H <sub>32</sub> N <sub>6</sub> O <sub>4</sub> S | Log S (ESOL)               | -4.22                              |
| Rotatable bond number                  | 8                                                               | Class                      | Moderately soluble                 |
| Num of aromatic heavy atoms            | 15                                                              | Solubility                 | 1.09e-02 mg/ml; 2.23e-05 mol/l     |
| Molecular weight                       | 488.60 g/mol                                                    | Log S (Ali)                | -4.65                              |
| Num. of H-bond acceptors               | 8                                                               | Class                      | Moderately soluble                 |
|                                        |                                                                 | Solubility                 | 2.98e-04 mg/ml; 6.10e-07 mol/l     |
| Num. of H-bond donors                  | 1                                                               | Class                      | Poorly soluble                     |
| Fraction Csp <sup>3</sup>              | 0.52                                                            | Log S (SILICOS-IT)         | -6.21                              |
| TPSA                                   | 121.28 Å <sup>2</sup>                                           | <b>Medicinal Chemistry</b> |                                    |
| Molar Refractivity                     | 138.53                                                          | Synthetic accessibility    | 4.26                               |
| <b>Lipophilicity</b>                   |                                                                 | Leadlikeness               | No; 2 violations: MW>350, Rotors>7 |
| Log Po/w (XLOGP3)                      | 2.46                                                            | Brenk                      | 0 alert                            |
| Consensus Log Po/w                     | 2.58                                                            | PAINS                      | 0 alert                            |
| Log Po/w (iLOGP)                       | 3.80                                                            | <b>Pharmacokinetics</b>    |                                    |
| Log Po/w (SILICOS-IT)                  | 2.42                                                            | P-gp substrate             | Yes                                |
| Log Po/w (MLOGP)                       | 1.82                                                            | Skin permeation (Log Kp)   | -7.53 cm/s                         |
| Log Po/w (WLOGP)                       | 2.39                                                            | Permeable to BBB           | No                                 |
| <b>Druglikeness</b>                    |                                                                 | CYP2D6 inhibition          | No                                 |
| Ghose                                  | No; 2 violations: MW>480, MR>130                                | GI absorption              | High                               |
| Lipinski                               | Yes; 0 violations                                               | CYP1A2 inhibition          | No                                 |
| Egan                                   | Yes                                                             | CYP2C19 inhibition         | No                                 |
| Muegge                                 | Yes                                                             | CYP2C9 inhibition          | Yes                                |
| The score of bioavailability           | 0.55                                                            | CYP3A4 inhibition          | Yes                                |
| Veber                                  | Yes                                                             |                            |                                    |

**Table S2.** MRM mass spectrometric features for VRF and TDF (IS) as adjusted by the IntelStart software.

| <b>Compound</b> | <b>Formula/Mass</b>   | <b>Transition</b> | <b>Parent m/z</b> | <b>Cone Voltage</b> | <b>Daughters</b> | <b>Collision Energy</b> | <b>Ion Mode</b> |
|-----------------|-----------------------|-------------------|-------------------|---------------------|------------------|-------------------------|-----------------|
| <b>VRF MRM</b>  | $C_{23}H_{32}N_6O_4S$ | 1                 | 489.32            | 16                  | 151.04           | 76                      | ES+             |
|                 |                       | 2                 | 489.32            | 16                  | 72.01            | 64                      | ES+             |
| <b>TDF MRM</b>  | $C_{22}H_{19}N_3O_4$  | 1                 | 390.17            | 78                  | 268.13           | 14                      | ES+             |
|                 |                       | 2                 | 390.17            | 78                  | 135.04           | 34                      | ES+             |

**Table S3.** The twelve principles of the AGSA software for the UPLC-MS/MS method.

| Principles | Choices                                                                 | Answer                                                             | Points |
|------------|-------------------------------------------------------------------------|--------------------------------------------------------------------|--------|
| 1          | <b>Direct Analysis</b>                                                  |                                                                    |        |
|            | What is the extent of sample treatment required before analysis?        | Extensive treatment (e.g., extraction, filtration, concentration)  | 1      |
| 2          | <b>Minimum Sample Size</b>                                              |                                                                    |        |
|            | What is the sample size required for the analysis?                      | Less than 0.1 gram                                                 | 3      |
| 3          | <b>In-Situ Measurements</b>                                             |                                                                    |        |
|            | Where are the measurements performed?                                   | Measurements are performed directly at the sampling site (in situ) | 3      |
| 4          | <b>Integration of Analytical Processes</b>                              |                                                                    |        |
|            | What is the level of integration of analytical processes?               | Separate processes requiring multiple steps and instruments        | 1      |
| 5          | <b>Automation and Miniaturization</b>                                   |                                                                    |        |
|            | What is the degree of automation of the method?                         | Semi-automated                                                     | 1      |
|            | What is the degree of miniaturization of the method?                    | Semi-miniaturized                                                  | 1      |
| 6          | <b>Avoid Derivatization</b>                                             |                                                                    |        |
|            | Does the method require derivatization?                                 | No derivatization required                                         | 3      |
| 7          | <b>Minimum Waste and Efficient Waste Management</b>                     |                                                                    |        |
|            | What is the volume of waste generated by the method?                    | Less than 100 milliliters per sample                               | 1.5    |
|            | How is analytical waste managed in the method?                          | Proper waste disposal is performed                                 | 1      |
| 8          | <b>High Throughput</b>                                                  |                                                                    |        |
|            | How many analytes are determined by the method in a single run?         | 2-3 analytes                                                       | 2      |
| 9          | <b>Low Energy Consumption</b>                                           |                                                                    |        |
|            | What is the amount of energy consumed by the analytical process?        | >1.5 KW/sample                                                     | 1      |
| 10         | <b>Use of Renewable Reagents</b>                                        |                                                                    |        |
|            | What is the source of reagents used in the method?                      | Non-renewable, synthetic reagents                                  | 1      |
| 11         | <b>Low Toxicity</b>                                                     |                                                                    |        |
|            | What is the toxicity level of reagents used in the method?              | 3-5 pictograms                                                     | 2      |
| 12         | <b>Operator Safety</b>                                                  |                                                                    |        |
|            | What level of safety is provided for the operator during the procedure? | Moderate-risk procedures requiring some PPE                        | 2      |

## References

1. M. W. Attwa, A. S. Abdelhameed and A. A. Kadi, *Heliyon*, 2024, **10**.
2. M. W. Attwa, A. S. Abdelhameed and A. A. Kadi, *Medicina*, 2024, **60**, 1626.
3. I. Muegge, *Medicinal Research Reviews*, 2003, **23**, 302-321.
4. M. Motiwale, H. Verma, O. Silakari and B. Sapra, *Computational Drug Delivery: Molecular Simulation for Pharmaceutical Formulation*, 2024, 39.
5. M. W. Attwa, A. S. Abdelhameed and A. A. Kadi, *Medicina*, 2024, **60**, 1914.
